# Supplementary material
Source: PubMed Central journal article supplement (PMC2910383)
Supplement: supp_dev.053181_DEV053181TableS1.pdf [file supp_dev.053181_DEV053181TableS1.pdf]

**Table S1. Genes tested by RNAi knockdown or ectopic expression for effects on Notch reporters**

| bHLH RNAi lines tested for loss of <i>E(spl)m6-GFP (1151-Gal4)</i> | bHLH lines tested for ectopic <i>E(spl)m6-GFP (sd-Gal4)</i> |
|--------------------------------------------------------------------|-------------------------------------------------------------|
| UAS-TapRNAi                                                        | UAS-Da(II)                                                  |
| UAS-Da-RNAi                                                        | UAS-nau2                                                    |
| UAS-HLH54F-RNAi                                                    | UAS-ac                                                      |
| UAS-sage-RNAi                                                      | UAS-sc                                                      |
| UAS-HLH3B-RNAi                                                     | UAS-dimm                                                    |
| UAS-Usf-RNAi                                                       | UAS-Ato                                                     |
| UAS-Sim-RNAi                                                       | UAS-Amos                                                    |
| UAS-Tango-RNAi                                                     | UAS-deiH2                                                   |
| UAS-Side-RNAi                                                      | UAS-Net/CyO                                                 |
|                                                                    | UAS-sageRNAi59.1                                            |
|                                                                    | Pbac(WH)Hand/CyO                                            |
|                                                                    | P(EP)crp                                                    |
|                                                                    | P(XP)BigMax                                                 |
|                                                                    | EP(gy2)MioEY00908                                           |
|                                                                    | UAS-HLH106                                                  |
|                                                                    | UAS-myc                                                     |
|                                                                    | UAS-Met                                                     |
|                                                                    | UAS-dys                                                     |
|                                                                    | UAS-ss                                                      |
|                                                                    | UAS-Trachealess                                             |
|                                                                    | UAS-sima                                                    |
|                                                                    | UAS-cycle                                                   |
