# Supplementary material
Source: PubMed Central journal article supplement (PMC2910383)
Supplement: supp_dev.053181_DEV053181TableS2.pdf [file supp_dev.053181_DEV053181TableS2.pdf]

**Table S2. Significance of Su(H) association in comparison with constrained background model****Comparison of background models after 1000 rounds: DmD8 Twi ChIP data**

| Displacement of ChIP site (bp) | Su(H)/Twi overlaps | Z-score | P-value (random experiments with more overlaps) |
|--------------------------------|--------------------|---------|-------------------------------------------------|
| 1000                           | 177.98             | 3.09    | 0.002                                           |
| 2500                           | 152.59             | 7.13    | 0*                                              |
| 5000                           | 118.68             | 11.13   | 0*                                              |
| 7500                           | 100.98             | 13.63   | 0*                                              |
| 10,000                         | 86.57              | 14.96   | 0*                                              |

By comparison, overlaps in actual dataset=184.

\*Highly significant,  $P \leq 0.001$ .

**Comparison of background models after 1000 rounds: embryonic Twi ChIP data**

| Displacement of ChIP site (bp) | Su(H)/Twi overlaps | Z-score | P-value (random experiments with more overlaps) |
|--------------------------------|--------------------|---------|-------------------------------------------------|
| 1000                           | 67.97              | 2.13    | 0.029                                           |
| 2500                           | 62.51              | 2.89    | 0.004                                           |
| 5000                           | 55.26              | 3.92    | 0*                                              |
| 7500                           | 50.04              | 4.68    | 0*                                              |
| 10,000                         | 43.23              | 6.23    | 0*                                              |
| 50,000                         | 25.26              | 11.55   | 0*                                              |
| 100,000                        | 19.13              | 14.21   | 0*                                              |

By comparison, overlaps in actual dataset=73.

\*Highly significant,  $P \leq 0.001$ .
